1 **Hemagglutinin stalk-reactive antibodies interfere with influenza virus**  
2 **neuraminidase activity by steric hindrance**

3

4 **Authors:**

5 Yao-Qing Chen<sup>1</sup>, Linda Yu-Ling Lan<sup>2</sup>, Min Huang<sup>1</sup>, Carole Henry<sup>1</sup>, Patrick C. Wilson<sup>1,2</sup>

6 **Affiliations:**

7 <sup>1</sup>Department of Medicine, Section of Rheumatology, the Knapp Center for Lupus and Immunology,  
8 University of Chicago, Chicago, IL 60637, USA.

9 <sup>2</sup>The Committee on Immunology, University of Chicago, Chicago, IL 60637, USA.

10 **Summary:**

11 This study reports a new mechanism of protection that is mediated by influenza hemagglutinin-  
12 stalk reactive antibodies: inhibition of neuraminidase activity by steric hindrance, blocking access  
13 of neuraminidase to sialic acids when it is abutted next to hemagglutinin on whole virions.

14 **Abstract:**

15 Hemagglutinin (HA) stalk-reactive antibodies are the basis of several current “one-shot” universal  
16 influenza vaccine efforts because they protect against a wide spectrum of influenza virus strains.  
17 The appreciated mechanism of protection by HA-stalk antibodies is to inhibit HA stalk  
18 reconfiguration, blocking viral fusion and entry. This study shows that HA stalk-reactive  
19 antibodies also inhibit neuraminidase (NA) enzymatic activity, prohibiting viral egress. NA  
20 inhibition (NI) is evident for an attached substrate but not for unattached small molecule cleavage  
21 of sialic acid. This suggests that the antibodies inhibit NA enzymatic activity through steric  
22 hindrance, thus limiting NA access to sialic acids when adjacent to HA on whole virions.  
23 Consistently, F(ab')<sub>2</sub> fragments that occupy reduced area without loss of avidity or disrupted  
24 HA/NA interactions show significantly reduced NI activity. Notably, HA stalk binding antibodies  
25 lacking NI activity were unable to neutralize viral infection via microneutralization assays. This  
26 work suggests that NI activity is an important component of HA-stalk antibody mediated  
27 protection.

28

29 **Introduction:**

30 Influenza is an acute respiratory illness that causes epidemics and pandemics in the human  
31 population, causing up to 640,000 deaths annually worldwide (Iuliano et al., 2017). The influenza  
32 virus particle contains two major surface glycoproteins, hemagglutinin (HA) and neuraminidase

33 (NA). HA is a tetramer protein that contains a globular head and a stalk domain. The head domain  
34 mediates binding to host cellular receptor sialic acids, while the stalk domain fuses the virus and  
35 host cell membranes to allow the introduction of the influenza virus genes. The NA protein is  
36 essential for cleaving terminal sialic acid residues present on host glycoproteins (Figure 1A),  
37 allowing the ready dispersal of the newly generated virus (Matrosovich et al., 2004; Palese and  
38 Compans, 1976).

39 Antibodies are a major means of protection from influenza virus infections. Antibody-mediated  
40 immunity is the basis of current vaccines and most efforts for improving immunity to influenza.  
41 Influenza virus vaccinations induce antibodies that predominantly target the immunodominant  
42 globular head of influenza HA that blocks viral attachment to prevent infection (Corti et al., 2010;  
43 Wrammert et al., 2011). However, immunity to the HA-head domain is highly susceptible to  
44 influenza antigenic drift, or viral mutation, introducing novel amino acids and glycosylation sites  
45 that allow the virus to evade existing immunity. The stalk is a more conserved domain, allowing  
46 antibodies that target this region to neutralize a wide spectrum of influenza virus subtypes (Corti  
47 et al., 2011; Ekiert et al., 2009; Neu et al., 2016; Okuno et al., 1993). The current appreciated  
48 mechanism of protection by HA stalk-reactive antibodies (Abs) is to lock the hemagglutinin trimer  
49 in a pre-fusion conformation, preventing pH triggered conformational changes upon viral uptake  
50 into endocytic compartments. This conformational change exposes the fusion peptide that  
51 mediates fusion of the viral membrane to the host cell membrane and subsequent introduction of  
52 the viral genome (Wu and Wilson, 2018). Because of the highly conserved epitopes within the  
53 HA-stalk domain, induction of antibodies targeting this domain are the basis of several universal  
54 influenza vaccine concepts and ongoing clinical trials. Herein, we describe an additional  
55 mechanism of protection that is mediated by HA-stalk binding antibodies: the inhibition of NA  
56 activity through steric hindrance blocking access to HA-bound sialic acid.

57 We used a panel of well-characterized HA stalk-reactive mAbs to explore how the mAbs interfere  
58 with NA enzymatic activity as measured by enzyme linked lectin assay (ELLA) or the NA-STAR  
59 assay. ELLA uses sialated glycoprotein fetuin that is immobilized as a substrate to measure NI.  
60 This immobilized substrate will identify antibodies that inhibit either directly by binding close to  
61 the enzymatic active site or that sterically inhibits NA from abutting close enough to HA to cleave  
62 the sialic acid (Couzens et al., 2014). Conversely, the NA-STAR assay uses a small, soluble  
63 chemiluminescent substrate, and so more explicitly distinguishes antibodies that directly inhibit

64 the enzymatic activity of NA by binding close to the enzymatic site (Chen et al., 2018; Nguyen et  
65 al., 2010). Herein, we show that HA stalk-reactive mAbs inhibit the enzymatic activation of  
66 influenza A viruses by ELLA but not in NA-STAR assays, supporting a steric-inhibition model.  
67 Moreover, we detected reduced NI activity for the F(ab')<sub>2</sub> fragments from the stalk-reactive mAbs  
68 compared to the same whole antibodies, providing direct evidence that anti-HA stalk antibodies  
69 are sterically limiting NA access to sialic acids. The NI activity of HA-stalk binding but not NA-  
70 binding antibodies is disrupted by dissociating HA and NA from virions, further supporting steric-  
71 hindrance based mechanism of NI. Notably, only antibodies against the HA stalk with NI activity,  
72 including 2 with high affinity binding, were able to mediate microneutralization. These findings  
73 suggest that an important component of protection by anti-HA stalk reactive antibodies is via  
74 steric-inhibition of NI activity.

75

## 76 **Results:**

### 77 **Stalk-reactive mAbs interfere with influenza A virus NA activity**

78 It has been shown that a subset of NA-reactive antibodies bind NA outside of the enzymatic site  
79 and inhibit sialic acid cleavage only in ELLA but not NA-STAR assays (Chen et al., 2018). Two  
80 examples of these antibodies are indicated in Figures 1B (1000-3B06 against H1N1 influenza, and  
81 229-2C06 against H3N2 influenza). The mechanism of action of these antibodies is likely through  
82 steric inhibition of NA from accessing sialic acid molecules bound by HA (Figure 1C, left).  
83 Similarly, antibodies to epitopes on the outside periphery of the globular head of HA that do not  
84 inhibit hemagglutination, and so do not bind the HA receptor-binding domain, can nonetheless  
85 mediate protection by inhibiting viral egress similar to NI (Dreyfus et al., 2012). Thus, we  
86 hypothesized that antibodies to the stalk region of HA, which will occupy space on the side of the  
87 molecule, could similarly mediate NI activity, compounding the mechanism of protection  
88 mediated to include both inhibition of fusion and inhibition of egress. As expected (Kosik and  
89 Yewdell, 2017), antibodies binding the HA-head region of H1N1 and H3N2 influenza virus strains  
90 robustly inhibit NA activity by ELLA (Figure 1B, EM-4C04 against H1N1 influenza and 3-50008-  
91 2A06 against H3N2 influenza) because HA cannot bind the sialic acid on fetuin, and so NA is not  
92 in enough proximity for enzymatic activity (Figure 1C, right). To determine if HA-stalk antibodies  
93 elicit NI activity, we tested the well-characterized mAb 045-2B06 (Henry Dunand et al., 2015)  
94 that binds the HA-stalk regions of group 1 and 2 influenza A HA molecules and mAb CR9114 that

95 binds the HA-stalk of both A and B influenza strain HAs (Dreyfus et al., 2012). Both of these  
96 antibodies neutralize influenza *in vitro* and protect mice *in vivo* upon lethal challenge with  
97 influenza and can competitively inhibit the binding of the other (Henry Dunand et al., 2015),  
98 demonstrating that they bind similar protective HA-stalk epitopes. We find that both 045-2B06  
99 and CR9114 provide NI activity against both A/California/7/2009 (H1N1) and  
100 A/Switzerland/9715293/2013 (H3N2) by ELLA assay (Figure 1D). The likely mechanism for this  
101 inhibition is steric hindrance in which the antibodies block access of NA to the sialic acids mound  
102 by HA (Figure 1E). Conversely, neither 045-2B06 nor CR9114 had NI-activity to cleave the small,  
103 unattached substrate in the NA-STAR assay (Figure 1F), suggesting a mechanism of steric  
104 hindrance (compare Figures 1E versus 1G). Our results demonstrate that human antibodies reactive  
105 to the HA-stalk inhibit the enzymatic activity of NA protein on H1N1 and H3N2 influenza virus  
106 particles.

107

#### 108 **Stalk-reactive mAbs interfere with NA activity by steric hindrance**

109 Because the antibodies inhibited NI activity on the attached substrate of the ELLA assay but not  
110 on the free substrate of the NA-STAR assay, as depicted in Figures 1D and 1F, it appears the  
111 mechanism of inhibition is likely steric hindrance of NA access to the sialic acid when bound by  
112 HA. To investigate this possibility directly, we generated F(ab')<sub>2</sub> molecules from the 045-2B06  
113 and CR9114 mAbs to reduce the size of the molecules, and thus the degree of steric hindrance,  
114 without affecting the avidity of binding. The F(ab')<sub>2</sub> concentration of protein were also increased  
115 to ensure equivalent binding of the F(ab')<sub>2</sub> molecules with that of the mAbs (Figure 2A and 2B).  
116 Comparison via the ELLA assay showed that indeed the F(ab')<sub>2</sub> molecules had significantly  
117 reduced NI activity in comparison to the whole mAbs against both H1N1 and H3N2 influenza  
118 viruses (Figure 2C). Thus, while not completely allowing access of NA to the sialic acid, the  
119 smaller antibody fragments allowed increased NA access to the substrate (Figure 2D), supporting  
120 a steric hindrance model of NI by HA-stalk binding antibodies. As a final verification that  
121 antibodies to the HA-stalk were inhibiting NA through steric hindrance, we dissociated the HA  
122 and NA molecules from the virions, thus allowing NA to access the sialic acid substrates  
123 completely independently of HA, regardless of the presence of antibody. For this analysis we  
124 performed the ELLA assay in the presence of 1% of Triton X-100 to disrupt the viral envelope

125 lipid bilayer, releasing HA and NA similarly to seasonal split influenza virus vaccine production  
126 (Gross et al., 1981). The detergent treatment completely abrogated NI activity of all the HA-stalk-  
127 reactive and HA-head-reactive mAbs against both H1N1 and H3N2 virus strains, further  
128 supporting the steric hindrance model for NI activity (Figure 3A and 3B). However, the NA-  
129 reactive antibodies were able to inhibit NI activity, demonstrating integrity of the assay after  
130 detergent treatment. In total, these various results demonstrate that in addition to the well-  
131 appreciated mechanism of action disrupting viral entry, antibodies to the HA-stalk region also  
132 inhibit the access of NA to sialic acid by steric hindrance and thus reduce viral egress.

133

134 **Stalk-reactive mAbs have varying capacities for NA enzymatic inhibition activity that**  
135 **appears important for potency**

136 Various HA-stalk reactive antibodies have been shown to have distinct amino acids involved in  
137 binding, various angles of interaction, and differences in specificity as indicated by the spectrum  
138 of influenza strains bound (Wu and Wilson, 2018). Thus it is predicted that not all HA-stalk  
139 binding antibodies will elicit NI activity to the same degree. Therefore we tested a panel of 13  
140 human mAbs that were verified to bind HA-stalk epitopes (Andrews et al., 2015) for NI activity  
141 by ELLA. Criteria for being classified as HA-stalk reactive included competitive binding with  
142 structure-verified HA-stalk reactive antibodies including CR9114 (Dreyfus et al., 2012) and SC70-  
143 F02 (Nachbagauer et al., 2018), as well as binding in a pH dependent fashion as the HA-stalk  
144 epitope is disrupted at low pH (Andrews et al., 2015). The majority, but not all, of the anti-HA  
145 stalk antibodies tested could inhibit NA activity, including: 69% (9 of 13) that are reactive with an  
146 H1N1 influenza virus (Figure 4A and 4C) and 3 of 4 on hand that bind an H3N2 influenza virus  
147 (Figure 4B and 4D). Notably, none of these antibodies had NI activity using the NA-STAR assay  
148 (Figure 4E-H), suggesting that as with CR9114 and 045-2B06, they all inhibit NI via steric  
149 interference of NA to sialic acid. Importantly, after testing the panel of mAbs by  
150 microneutralization (MN) assay, we noted that only those antibodies that have NI activity were  
151 able neutralize viral infection *in vitro* (Figure 5A and 5B). While two of the antibodies that lack  
152 MN capacity were low avidity, possibly explaining the lack of both MN and NI activities, the other  
153 two were of equal avidity to the set of HA stalk binding antibodies that did inhibit NI and neutralize  
154 (Figure 5C). The lack of NI and MN activity of two of the HA-stalk binding antibodies that have

155 high avidity suggests that the epitope is bound in an atypical fashion. Thus we considered if these  
156 antibodies were of the stereo-typical variety with restricted variable gene repertoires, biased for  
157 VH1-69 and VH1-18 immunoglobulin heavy chain gene usage. Notably, while most of the NI+  
158 antibodies appear to be stereotypical (Figure 6A), none of the NI-negative anti-HA stalk antibodies  
159 used the most typical anti-HA stalk VH gene, VH1-69 (Figure 6B). Also, one of the high avidity  
160 but NI-negative antibodies used VH3-23, which is indeed atypical, while the other high avidity  
161 NI-negative antibody was encoded by VH1-18, which is a common stalk-related gene that is highly  
162 similar to VH1-69. There were no other features of the immunoglobulin gene repertoire that were  
163 distinct between NI-positive and NI-negative antibodies (Figure 6C-6F). These studies  
164 demonstrate that while the majority of HA-stalk reactive antibodies inhibit NA activity a subset  
165 do not and the capacity for NI appears to be important for potency.

166

#### 167 **Discussion:**

168 The development of a “one-shot” universal influenza vaccine that will provide long-term or  
169 improved immunity to influenza epidemics and pandemics is currently a major focus of the  
170 biomedical community (Paules et al., 2017a; Paules et al., 2017b). The HA stalk is an important  
171 target for the ongoing design of universal influenza vaccines and for recent and ongoing clinical  
172 trials because the protective epitopes in this portion of HA are highly conserved across many  
173 influenza subtypes (Henry et al., 2018; Krammer et al., 2018; Wu and Wilson, 2018). While the  
174 appreciated mechanism of action of HA-stalk binding antibodies is to inhibit viral entry via  
175 disrupting the HA conformational change required for viral-envelope to host cell membrane fusion,  
176 there was one recent report using a microscopy-based assay suggesting the anti-HA stalk  
177 antibodies also block influenza virus particle release (Yamayoshi et al., 2017). Herein, we show  
178 that antibodies to the HA-stalk region inhibit the activity of NA through steric hindrance on whole  
179 virions, adding to the mechanisms of protection mediated by this broadly-reactive class of  
180 antibodies, and providing a mechanism for the previously observed inhibition of viral release.

181 It is notable that not all antibodies binding the HA-stalk region can inhibit NI activity, although  
182 for the collection of anti-stalk antibodies tested for this study, NI activity correlated perfectly with  
183 MN activity. Thus, NI activity is in the least an important correlate of neutralization-capacity, or  
184 at most a critical component of the activity of anti-HA stalk binding antibodies. In future studies,

185 it will be important to distinguish the relative contributions of inhibiting viral entry versus viral  
186 egress for HA-stalk reactive antibodies in protection.

187 A second interesting observation that should be evaluated is that there is a potential correlation  
188 between the capacity for NI activity and the type of HA-stalk antibody elicited in that none of the  
189 NI-negative antibodies binding the HA stalk were encoded by the stereotypical VH1-69 gene. A  
190 more substantial evaluation of many anti-stalk antibodies for various properties and structural  
191 studies to evaluate the particular contact residues and angle of binding for stalk-binding antibodies  
192 that are NI will provide insight into this issue. Identifying stereotypical features for anti-HA stalk  
193 antibodies with NI activity could inform on universal influenza vaccine design by, for example,  
194 providing an impetus to develop germline boosting prime-boost strategies to elicit a particular  
195 class of anti-HA stalk antibodies preferentially.

196 In conclusion, this study identifies NI inhibition as a new and additional mechanism of action for  
197 the important class of anti-influenza antibodies that bind highly-conserved epitopes on the HA  
198 stalk.

199

## 200 **Materials and Methods**

### 201 **Cells and viruses**

202 Both the Human Embryonic Kidney (HEK) 293T cells and Madin-Darby Canine Kidney  
203 (MDCK) cells were obtained from ATCC. The 293T cells were maintained at 37°C with 5%  
204 CO<sub>2</sub> in Advanced DMEM cell medium with 2% Ultra-Low IgG FBS (Gibco), 2 mM GlutaMAX  
205 (Gibco), plus penicillin and streptomycin (100 mg/ml; Gibco). The MDCK cells were maintained  
206 at 37°C with 5% CO<sub>2</sub> in DMEM cell medium with 10% FBS (Gibco), 1% L-Glutamine (Gibco)  
207 and 1% Antibiotic-Antimycotic (Gibco) with All influenza virus stocks (A/California/7/2009  
208 H1N1 and A/Switzerland/9715293/2013 H3N2) used for the assays were freshly grown in  
209 specific pathogen free (SPF) eggs, harvested, purified, titered and stored at -80°C.

210

### 211 **Recombinant monoclonal antibody expression and purification**

212 Antibodies were generated as previously described (Andrews et al., 2015; Henry Dunand et al.,  
213 2016; Smith et al., 2009; Wrammert et al., 2008). Briefly, the VH, Vk or Vλ genes amplified

214 from each single cell were cloned into IgG1, Igk or Igl expression vectors as previously  
215 mentioned. 9 µg of each paired heavy and light chain plasmid DNA were transfected into the 293  
216 cells using PEI (name of the brand) and incubated overnight. The next day, the transfection  
217 media was aspirated from each plate and replaced by 25 ml of PFHM-II (Gibco). Secreted mAbs  
218 were purified from the supernatant using protein A beads 4-5 days later. The mAbs was further  
219 concentrated and buffer exchanged with PBS (pH 7.4) using Amicon Ultra centrifugal filter units  
220 (30 kDa cutoff; Millipore). The final protein concentration was determined using a NanoDrop  
221 device (Thermo Scientific).

222

### 223 Preparation of F(ab')<sub>2</sub> monoclonal antibody fragments

224 The whole antibodies CR9114 and 045-2B06 were reduced to a F(ab')<sub>2</sub> fragment using the  
225 Pierce™ F(ab')<sub>2</sub> digestion kit (Cat#: 44988, Thermo Fisher) according to the manufactures  
226 instructions.

227

### 228 Enzyme linked immunosorbent assay (ELISA)

229 High-protein binding microtiter plates (Costar) were coated with recombinant HAs or NAs at  
230 1 µg/ml in phosphate buffered saline (PBS) overnight at 4°C. After blocking, serially diluted (3  
231 fold) antibodies starting at 10 µg/ml were incubated for 1 h at 37°C. Horse radish peroxidase  
232 (HRP)-conjugated goat anti-human IgG antibody diluted 1:1000 (Jackson Immuno Research)  
233 was used to detect binding of mAbs, and was developed with Super Aquablue ELISA substrate  
234 (eBiosciences). Absorbance was measured at 405nm on a microplate spectrophotometer  
235 (BioRad). To standardize the assays, antibodies with known binding characteristics were  
236 included on each plate and the plates were developed when the absorbance of the control reached  
237 3.0 OD units (Denise Lau et al., 2017). To determine the binding of F(ab')<sub>2</sub> fragment by ELISA,  
238 an HRP-conjugated goat anti-kappa antibody (SouthernBiotech) was used as a secondary  
239 antibody.

240

### 241 NA enzyme linked lectin assay (ELLA)



242 ELLAs were performed as previously described (Westgeest et al., 2015). Flat-bottom 96-well  
243 plates (Thermo Scientific) were coated with 100  $\mu$ l of fetuin (Sigma) at 25  $\mu$ g/ml overnight at 4°C.  
244 Antibodies were serially diluted (twofold) in Dulbecco's phosphate-buffered saline (DPBS) with  
245 0.05% Tween 20 and 1% BSA (DPBSTBSA), then incubated in duplicate fetuin-coated plates with  
246 an equal volume of the selected virus particles dilution in DPBSTBSA. These plates were  
247 incubated for 18 h at 37°C and washed six times with PBS with 0.05% Tween 20, and 100  $\mu$ l/well  
248 of HRP-conjugated peanut agglutinin lectin (PNA-HRPO, Sigma–Aldrich) in DPBSTBSA was  
249 added for 2h at RT in the dark. The plates were washed six times and were developed with Super  
250 Aquablue ELISA substrate (eBiosciences). Absorbance was read at 405nm on a microplate  
251 spectrophotometer (BioRad). Data points were analyzed using Prism software and the 50%  
252 inhibition concentration (IC<sub>50</sub>) was defined as concentration at which 50% of the NA activity was  
253 inhibited compared to the negative control.

254

#### 255 NA-STAR assay

256 The NA-STAR assay was performed according to the Resistance Detection Kit manufacturer's  
257 instructions (Applied Biosystems, Darmstadt, Germany) (Nguyen et al., 2010). In brief, 25  $\mu$ l test  
258 mAbs in serial twofold dilutions in NA-STAR assay buffer (26 mM 2-(N-morpholino)  
259 ethanesulfonic acid ; 4 mM calcium chloride; pH 6.0) were mixed with 25  $\mu$ l of 4 X IC<sub>50</sub> of virus  
260 and incubated at 37°C for 30 min. After adding 10  $\mu$ l of 1000 $\times$  diluted NA-STAR substrate, the  
261 plates were incubated at room temperature for another 30 minutes. The reaction was stopped by  
262 adding 60  $\mu$ l of NA STAR accelerator. The chemiluminescent was determined by using the DTX  
263 880 plate reader (Beckman Coulter). Data points were analyzed using Prism software and the 50%  
264 inhibition concentration (IC<sub>50</sub>) was defined as concentration at which 50% of the NA activity was  
265 inhibited compared to the negative control. The final concentration of antibody (IC<sub>50</sub>) was  
266 determined using Prism software (GraphPad).

267

#### 268 NI assay in the presence of detergent

269 To perform NI assay in the presence of detergent, all steps remained identical to those listed  
270 above, except the following: firstly, a final concentration of 1% of Triton X-100 (Fisher

271 Bioreagents) was added directly to the virus particles, shaken gently at 37 °C for 1 hour. During  
272 this time, antibodies were diluted using PBS with 1% Triton X-100. Prior to incubation with  
273 mAbs, the virus preparation was diluted in PBS containing 1% BSA and 1% Triton X-100. The  
274 NI assay was then performed as detailed above.

275

#### 276 Microneutralization assay (MN)

277 MN assay for antibody characterization was carried out as previously described (Henry Dunand  
278 et al., 2015). Briefly, MDCK cells were maintained in Dulbecco's modified Eagle's medium  
279 (DMEM) supplemented with 10% fetal bovine serum (FBS) at 37°C with 5% CO<sub>2</sub>. On the day  
280 before the experiment, confluent MDCK cells in a 96-well format were washed twice with PBS  
281 and incubated in minimal essential medium (MEM) supplemented with 1 µg/ml trypsin-TPCK.  
282 Serial 2-fold dilutions (starting concentration 64 µg/ml) of mAb were mixed with an equal  
283 volume of 100 50% tissue culture infectious doses (TCID<sub>50</sub>) virus and incubated for 1 h at 37°C.  
284 The mixture was removed and cells were cultured for 20 h at 37°C with 1X MEM supplemented  
285 with 1 µg/ml trypsin-TPCK and appropriate mAb concentration. Cells were washed twice with  
286 PBS, fixed with 80% acetone at -20°C for 1 h or overnight, washed 3 times with PBST, blocked  
287 for 30 min with 10% FBS and then treated for 30 min with 2% H<sub>2</sub>O<sub>2</sub> at room temperature (RT).  
288 An anti-NP-biotinylated antibody (1:3000) in 3% BSA-PBS was incubated for 1h at RT. The  
289 plates were developed with Super Aquablue ELISA substrate and read at 405 nm. The signal  
290 from uninfected wells was averaged to represent 100% inhibition. Virus infected wells without  
291 mAb were averaged to represent 0% inhibition. Duplication wells were used to calculate the  
292 mean and SD of neutralization, and inhibitory concentration 50 (IC<sub>50</sub>) was determined by a  
293 sigmoidal dose response curve. The inhibition ratio (%) was calculated as below:  $(OD(\text{Pos. Control}) - OD(\text{Sample})) / (OD(\text{Pos. Control}) - OD(\text{Neg. Control})) \times 100\%$ . The final  
294 concentration of antibody that reduced infection to 50% (IC<sub>50</sub>) was determined using Prism  
295 software (GraphPad).

297

#### 298 Data analysis and statistics

299 GraphPad Prism 7 was used to perform all statistical analyses. Statistical significance is indicated  
300 as follows: n.s. (not significant),  $P > 0.05$ ; \*,  $P \leq 0.05$ ; \*\*,  $P \leq 0.01$ ; \*\*\*. Data was  
301 presented as mean + standard deviation (SD) of triplicates.

302

303 **Author contributions:**

304 Y.-Q.C. designed and performed experiments, analyzed data, and wrote the manuscript. L.Y.-  
305 L.L., M.H. and C.H. performed experiments and revised the manuscript. P.C.W. designed and  
306 directed the project, analyzed data and wrote the manuscript.

307

308 **Acknowledgments:**

309 We thank Nai-Ying Zheng for purifying influenza viruses and experimental assistance. This  
310 project was funded in part from the National Institute of Allergy and Infectious Disease; the  
311 National Institutes of Health grant numbers U19AI082724 (P.C.W.), 5U19AI109946 (P.C.W.),  
312 U19AI057266 (P.C.W.), and the NIAID Centers of Excellence for Influenza Research and  
313 Surveillance (CEIRS) grant numbers HHSN272201400005C (P.C.W., D.J.T., and J.T.).

314 The authors declare no financial or commercial conflicts of interest.

315

316 **Figure legends:**

317 **Figure 1. HA stalk-reactive mAbs inhibit influenza virus NA activity.** (A) Model of NA  
318 activity to cleave bound sialic acids to release newly-made virus particles. Note that the cleaved  
319 sialic acid substrates provide the change in signal (reduced) for the ELLA and NA-STAR assay  
320 readouts. (B) Examples of HA head-reactive mAbs and NA-binding mAbs with NI activity are  
321 provided to illustrate inhibition of NA enzymatic activity via ELLA assays against  
322 A/California/7/2009 (H1N1) virus and A/Switzerland/9715293/2013 (H3N2) virus. (C) Model  
323 for how HA head-reactive mAb and NA-reactive mAb inhibit NA from cleaving off the sialic acid  
324 from the host cell receptors. (D) HA stalk-reactive mAbs were tested for inhibiting NA enzymatic  
325 activity via ELLA assays against A/California/7/2009 (H1N1) virus and  
326 A/Switzerland/9715293/2013 (H3N2) virus. (E) Model for how HA stalk-reactive mAbs inhibit  
327 NA from cleaving off the sialic acid from the host cell receptors via steric hindrance. (F) HA stalk-  
328 reactive mAbs were tested for inhibiting NA enzymatic activity via NA-STAR assays against

329 A/California/7/2009 (H1N1) virus and A/Switzerland/9715293/2013 (H3N2) virus. **(G)** Models  
330 for why NA-reactive but not HA stalk-reactive mAbs can inhibit NA from cleaving the sialic acid  
331 in the NA-STAR assays. Oseltamivir was used as a positive control. Results are shown as mean  $\pm$   
332 s.d. of three independent experiments.

333

334 **Figure 2. F(ab')<sub>2</sub> molecules from stalk-reactive mAbs have reduced interference of virus NA**  
335 **activity by steric hindrance (A)** Binding avidity of 045-2B06 and its F(ab')<sub>2</sub> fragment against  
336 A/California/7/2009 rHA. **(B)** Binding avidity of CR9114 and its F(ab')<sub>2</sub> fragments against  
337 A/California/7/2009 rHA. **(C)** HA stalk-reactive mAbs and their F(ab')<sub>2</sub> fragments were tested for  
338 inhibiting NA enzymatic activity via ELLA assays against A/California/7/2009 (H1N1) virus and  
339 A/Switzerland/9715293/2013 (H3N2) virus. **(D)** Model for why F(ab')<sub>2</sub> fragments of HA-stalk  
340 reactive mAbs have reduced inhibition of NI in ELLA assays. Results are shown as mean  $\pm$  s.d. of  
341 three independent experiments.

342

343 **Figure 3. HA-stalk reactive mAbs cannot interfere with influenza virus NA activity if HA**  
344 **and NA are dissociated from the viral envelope.** A/California/7/2009 (H1N1) virus and  
345 A/Switzerland/9715293/2013 (H3N2) virus were treated with 1% TritonX-100 for 1h at 37C **(A)**  
346 HA-stalk and -head reactive mAbs as well as NA-reactive mAbs were tested for NI activity via  
347 ELLA assays against TritonX-100 treated A/California/7/2009 (H1N1) virus and  
348 A/Switzerland/9715293/2013 (H3N2) virus. **(B)** Model for why HA-reactive mAbs cannot disrupt  
349 NA activity whereas NA-reactive mAbs can when the HA and NA glycoproteins are dissociated  
350 from the viral envelope. Results are shown as mean  $\pm$  s.d. of two independent experiments.

351

352 **Figure 4. Stalk-reactive mAbs affect virus NA activity differently (A and C)** A set of HA stalk-  
353 reactive mAbs were tested for NI activity via ELLA assays against A/California/7/2009 (H1N1)  
354 virus. Oseltamivir was used as a positive control. **(B and D)** A set of HA stalk-reactive mAbs were  
355 tested for NI activity via ELLA assays against A/Switzerland/9715293/2013 (H3N2) virus. are  
356 represented as half-maximum inhibitory concentration IC<sub>50</sub> (nM). **(E and G)** A set of HA stalk-  
357 reactive mAbs were tested for NI activity via NA-STAR assays against A/California/7/2009  
358 (H1N1) virus. **(F and H)** A set of HA stalk-reactive mAbs were tested for NI activity via NA-  
359 STAR assays against A/Switzerland/9715293/2013 (H3N2) virus. Data in panels C, D, G, and H

360 represent half-maximum inhibitory concentrations or IC<sub>50</sub> (nM). Oseltamivir was used as a  
361 positive control for all assays. Data are representative of two independent experiments.

362

~~363~~

368 **Figure 5. NI activity of influenza HA-stalk reactive antibodies correlates with**  
369 **microneutralization capacity (A and B)** HA stalk-reactive mAbs with or without NI activity  
370 were tested for neutralization in vitro microneutralization (MN) assays using (A)  
371 A/California/7/2009 (H1N1) virus and (B) A/Switzerland/9715293/2013 (H3N2) virus. Data are  
372 represented as half-maximum inhibitory concentrations or IC<sub>50</sub> (µg /ml). Positive control HA-  
373 reactive mAbs EM-4C04 (anti-H1N1) and 229-1C01 (anti-H3N2) bind HA and neutralize these  
374 influenza virus strains. Influenza-non-reactive mAb 003-15D3 was used as a negative control in  
375 the assays. (C) HA stalk-reactive mAbs were tested for binding affinity against HA recombinant  
376 protein. Binding avidities (K<sub>D</sub>) were estimated by Scatchard plot analyses of ELISA data. Bars  
377 indicate median values. Data are representative of two independent experiments. n.s., not  
378 significant.

379

380

381 **Figure 6. Heavy chain gene features of HA stalk-reactive mAbs with or without NI activity**  
382 **(A and B)** Usage of VH immunoglobulin genes by (A) HA stalk-reactive B cells with NI activity  
383 and (B) HA stalk-reactive B cells without NI activity. **(C and D)** Usage of JH immunoglobulin  
384 genes by (C) HA stalk-reactive B cells with NI activity and (D) HA stalk-reactive B cells without  
385 NI activity. **(E)** CDR3 length of HA stalk-reactive mAbs with and without NI activity, data are  
386 represented as mean ± SD. **(F)** Total heavy chain amino acid mutations for HA stalk-reactive mAbs  
387 with and without NI activity based on analysis using the NCBI IgBlast tool  
388 (<https://www.ncbi.nlm.nih.gov/igblast/>), data are represented as mean ± SD.

389

390

391

392

- 393 Andrews, S.F., Y. Huang, K. Kaur, L.I. Popova, I.Y. Ho, N.T. Pauli, C.J. Henry Dunand, W.M.  
394 Taylor, S. Lim, M. Huang, X. Qu, J.H. Lee, M. Salgado-Ferrer, F. Krammer, P. Palese, J.  
395 Wrarmert, R. Ahmed, and P.C. Wilson. 2015. Immune history profoundly affects  
396 broadly protective B cell responses to influenza. *Sci Transl Med* 7:316ra192.
- 397 Chen, Y.Q., T.J. Wohlbold, N.Y. Zheng, M. Huang, Y. Huang, K.E. Neu, J. Lee, H. Wan, K.T.  
398 Rojas, E. Kirkpatrick, C. Henry, A.E. Palm, C.T. Stamper, L.Y. Lan, D.J. Topham, J.  
399 Treanor, J. Wrarmert, R. Ahmed, M.C. Eichelberger, G. Georgiou, F. Krammer, and  
400 P.C. Wilson. 2018. Influenza Infection in Humans Induces Broadly Cross-Reactive and  
401 Protective Neuraminidase-Reactive Antibodies. *Cell* 173:417-429 e410.
- 402 Corti, D., A.L. Suguitan, Jr., D. Pinna, C. Silacci, B.M. Fernandez-Rodriguez, F. Vanzetta, C.  
403 Santos, C.J. Luke, F.J. Torres-Velez, N.J. Temperton, R.A. Weiss, F. Sallusto, K.  
404 Subbarao, and A. Lanzavecchia. 2010. Heterosubtypic neutralizing antibodies are  
405 produced by individuals immunized with a seasonal influenza vaccine. *J Clin Invest*  
406 120:1663-1673.
- 407 Corti, D., J. Voss, S.J. Gamblin, G. Codoni, A. Macagno, D. Jarrossay, S.G. Vachieri, D. Pinna,  
408 A. Minola, F. Vanzetta, C. Silacci, B.M. Fernandez-Rodriguez, G. Agatic, S. Bianchi, I.  
409 Giacchetto-Sasselli, L. Calder, F. Sallusto, P. Collins, L.F. Haire, N. Temperton, J.P.  
410 Langedijk, J.J. Skehel, and A. Lanzavecchia. 2011. A neutralizing antibody selected from  
411 plasma cells that binds to group 1 and group 2 influenza A hemagglutinins. *Science*  
412 333:850-856.
- 413 Couzens, L., J. Gao, K. Westgeest, M. Sandbulte, V. Lugovtsev, R. Fouchier, and M.  
414 Eichelberger. 2014. An optimized enzyme-linked lectin assay to measure influenza A  
415 virus neuraminidase inhibition antibody titers in human sera. *J Virol Methods* 210C:7-14.
- 416 Denise Lau, L.Y.-L.L., 1\* Sarah F. Andrews,2‡ Carole Henry,2 Karla Thatcher Rojas,2, M.H.  
417 Karlynn E. Neu, 2 Yunping Huang,2 Brandon DeKosky,3‡ Anna-Karin E. Palm,2, and  
418 G.G. Gregory C. Ippolito, 3,4,5 Patrick C. Wilson1,2. 2017. Low CD21 expression  
419 defines a population of recent germinal center graduates primed for plasma cell  
420 differentiation. *SCIENCE IMMUNOLOGY*
- 421 Dreyfus, C., N.S. Laursen, T. Kwaks, D. Zuijdgheest, R. Khayat, D.C. Ekiert, J.H. Lee, Z.  
422 Metlagel, M.V. Bujny, M. Jongeneelen, R. van der Vlugt, M. Lamrani, H.J. Korse, E.  
423 Geelen, O. Sahin, M. Sieuwerts, J.P. Brakenhoff, R. Vogels, O.T. Li, L.L. Poon, M.  
424 Peiris, W. Koudstaal, A.B. Ward, I.A. Wilson, J. Goudsmit, and R.H. Friesen. 2012.  
425 Highly conserved protective epitopes on influenza B viruses. *Science* 337:1343-1348.
- 426 Ekiert, D.C., G. Bhabha, M.A. Elsliger, R.H. Friesen, M. Jongeneelen, M. Throsby, J. Goudsmit,  
427 and I.A. Wilson. 2009. Antibody recognition of a highly conserved influenza virus  
428 epitope. *Science* 324:246-251.
- 429 Gross, P.A., F.A. Ennis, P.F. Gaerlan, C.R. Denning, U. Setia, W.J. Davis, and D.S. Bisberg.  
430 1981. Comparison of new triton X-100- and tween-ether-treated split-treated vaccines in  
431 children. *J Clin Microbiol* 14:534-538.
- 432 Henry, C., A.E. Palm, F. Krammer, and P.C. Wilson. 2018. From Original Antigenic Sin to the  
433 Universal Influenza Virus Vaccine. *Trends Immunol* 39:70-79.
- 434 Henry Dunand, Carole J., Paul E. Leon, M. Huang, A. Choi, V. Chromikova, Irvin Y. Ho,  
435 Gene S. Tan, J. Cruz, A. Hirsh, N.-Y. Zheng, Caitlin E. Mullarkey, Francis A. Ennis, M.

- 436 Terajima, John J. Treanor, David J. Topham, K. Subbarao, P. Palese, F. Krammer, and  
437 Patrick C. Wilson. 2016. Both Neutralizing and Non-Neutralizing Human H7N9  
438 Influenza Vaccine-Induced Monoclonal Antibodies Confer Protection. *Cell Host &*  
439 *Microbe* 19:800-813.
- 440 Henry Dunand, C.J., P.E. Leon, K. Kaur, G.S. Tan, N.Y. Zheng, S. Andrews, M. Huang, X. Qu,  
441 Y. Huang, M. Salgado-Ferrer, I.Y. Ho, W. Taylor, R. Hai, J. Wrammert, R. Ahmed, A.  
442 Garcia-Sastre, P. Palese, F. Krammer, and P.C. Wilson. 2015. Preexisting human  
443 antibodies neutralize recently emerged H7N9 influenza strains. *The Journal of clinical*  
444 *investigation* 125:1255-1268.
- 445 Iuliano, A.D., K.M. Roguski, H.H. Chang, D.J. Muscatello, R. Palekar, S. Tempia, C. Cohen,  
446 J.M. Gran, D. Schanzer, B.J. Cowling, P. Wu, J. Kyncl, L.W. Ang, M. Park, M.  
447 Redlberger-Fritz, H. Yu, L. Espenhain, A. Krishnan, G. Emukule, L. van Asten, S.  
448 Pereira da Silva, S. Aungkulanon, U. Buchholz, M.A. Widdowson, J.S. Bresee, and N.  
449 Global Seasonal Influenza-associated Mortality Collaborator. 2017. Estimates of global  
450 seasonal influenza-associated respiratory mortality: a modelling study. *Lancet*
- 451 Kosik, I., and J.W. Yewdell. 2017. Influenza A virus hemagglutinin specific antibodies interfere  
452 with virion neuraminidase activity via two distinct mechanisms. *Virology* 500:178-183.
- 453 Krammer, F., A. Garcia-Sastre, and P. Palese. 2018. Is It Possible to Develop a "Universal"  
454 Influenza Virus Vaccine? Potential Target Antigens and Critical Aspects for a Universal  
455 Influenza Vaccine. *Cold Spring Harb Perspect Biol* 10:
- 456 Matrosovich, M.N., T.Y. Matrosovich, T. Gray, N.A. Roberts, and H.D. Klenk. 2004.  
457 Neuraminidase is important for the initiation of influenza virus infection in human airway  
458 epithelium. *Journal of virology* 78:12665-12667.
- 459 Nachbagauer, R., D. Shore, H. Yang, S.K. Johnson, J.D. Gabbard, S.M. Tompkins, J. Wrammert,  
460 P.C. Wilson, J. Stevens, R. Ahmed, F. Krammer, and A.H. Ellebedy. 2018. Broadly  
461 Reactive Human Monoclonal Antibodies Elicited following Pandemic H1N1 Influenza  
462 Virus Exposure Protect Mice against Highly Pathogenic H5N1 Challenge. *J Virol* 92:
- 463 Neu, K.E., C.J. Henry Dunand, and P.C. Wilson. 2016. Heads, stalks and everything else: how  
464 can antibodies eradicate influenza as a human disease? *Curr Opin Immunol* 42:48-55.
- 465 Nguyen, H.T., T.G. Sheu, V.P. Mishin, A.I. Klimov, and L.V. Gubareva. 2010. Assessment of  
466 pandemic and seasonal influenza A (H1N1) virus susceptibility to neuraminidase  
467 inhibitors in three enzyme activity inhibition assays. *Antimicrob Agents Chemother*  
468 54:3671-3677.
- 469 Okuno, Y., Y. Isegawa, F. Sasao, and S. Ueda. 1993. A common neutralizing epitope conserved  
470 between the hemagglutinins of influenza A virus H1 and H2 strains. *J Virol* 67:2552-  
471 2558.
- 472 Palese, P., and R. Compans. 1976. Inhibition of influenza virus replication in tissue culture by 2-  
473 deoxy-2, 3-dehydro-N-trifluoroacetylneuraminic acid (FANA): mechanism of action.  
474 *Journal of General Virology* 33:159-163.
- 475 Paules, C.I., H.D. Marston, R.W. Eisinger, D. Baltimore, and A.S. Fauci. 2017a. The Pathway to  
476 a Universal Influenza Vaccine. *Immunity* 47:599-603.
- 477 Paules, C.I., S.G. Sullivan, K. Subbarao, and A.S. Fauci. 2017b. Chasing Seasonal Influenza -  
478 The Need for a Universal Influenza Vaccine. *N Engl J Med*
- 479 Smith, K., L. Garman, J. Wrammert, N.Y. Zheng, J.D. Capra, R. Ahmed, and P.C. Wilson. 2009.  
480 Rapid generation of fully human monoclonal antibodies specific to a vaccinating antigen.  
481 *Nature protocols* 4:372-384.

- 482 Westgeest, K.B., T.M. Bestebroer, M.I. Spronken, J. Gao, L. Couzens, A.D. Osterhaus, M.  
483 Eichelberger, R.A. Fouchier, and M. de Graaf. 2015. Optimization of an enzyme-linked  
484 lectin assay suitable for rapid antigenic characterization of the neuraminidase of human  
485 influenza A(H3N2) viruses. *J Virol Methods* 217:55-63.
- 486 Wrammert, J., D. Koutsouanos, G.M. Li, S. Edupuganti, J. Sui, M. Morrissey, M. McCausland,  
487 I. Skountzou, M. Hornig, W.I. Lipkin, A. Mehta, B. Razavi, C. Del Rio, N.Y. Zheng, J.H.  
488 Lee, M. Huang, Z. Ali, K. Kaur, S. Andrews, R.R. Amara, Y. Wang, S.R. Das, C.D.  
489 O'Donnell, J.W. Yewdell, K. Subbarao, W.A. Marasco, M.J. Mulligan, R. Compans, R.  
490 Ahmed, and P.C. Wilson. 2011. Broadly cross-reactive antibodies dominate the human B  
491 cell response against 2009 pandemic H1N1 influenza virus infection. *The Journal of*  
492 *experimental medicine* 208:181-193.
- 493 Wrammert, J., K. Smith, J. Miller, W.A. Langley, K. Kokko, C. Larsen, N.Y. Zheng, I. Mays, L.  
494 Garman, C. Helms, J. James, G.M. Air, J.D. Capra, R. Ahmed, and P.C. Wilson. 2008.  
495 Rapid cloning of high-affinity human monoclonal antibodies against influenza virus.  
496 *Nature* 453:667-671.
- 497 Wu, N.C., and I.A. Wilson. 2018. Structural insights into the design of novel anti-influenza  
498 therapies. *Nat Struct Mol Biol* 25:115-121.
- 499 Yamayoshi, S., R. Uraki, M. Ito, M. Kiso, S. Nakatsu, A. Yasuhara, K. Oishi, T. Sasaki, K.  
500 Ikuta, and Y. Kawaoka. 2017. A Broadly Reactive Human Anti-hemagglutinin Stem  
501 Monoclonal Antibody That Inhibits Influenza A Virus Particle Release. *EBioMedicine*  
502 17:182-191.

503

504



**Figure 1**

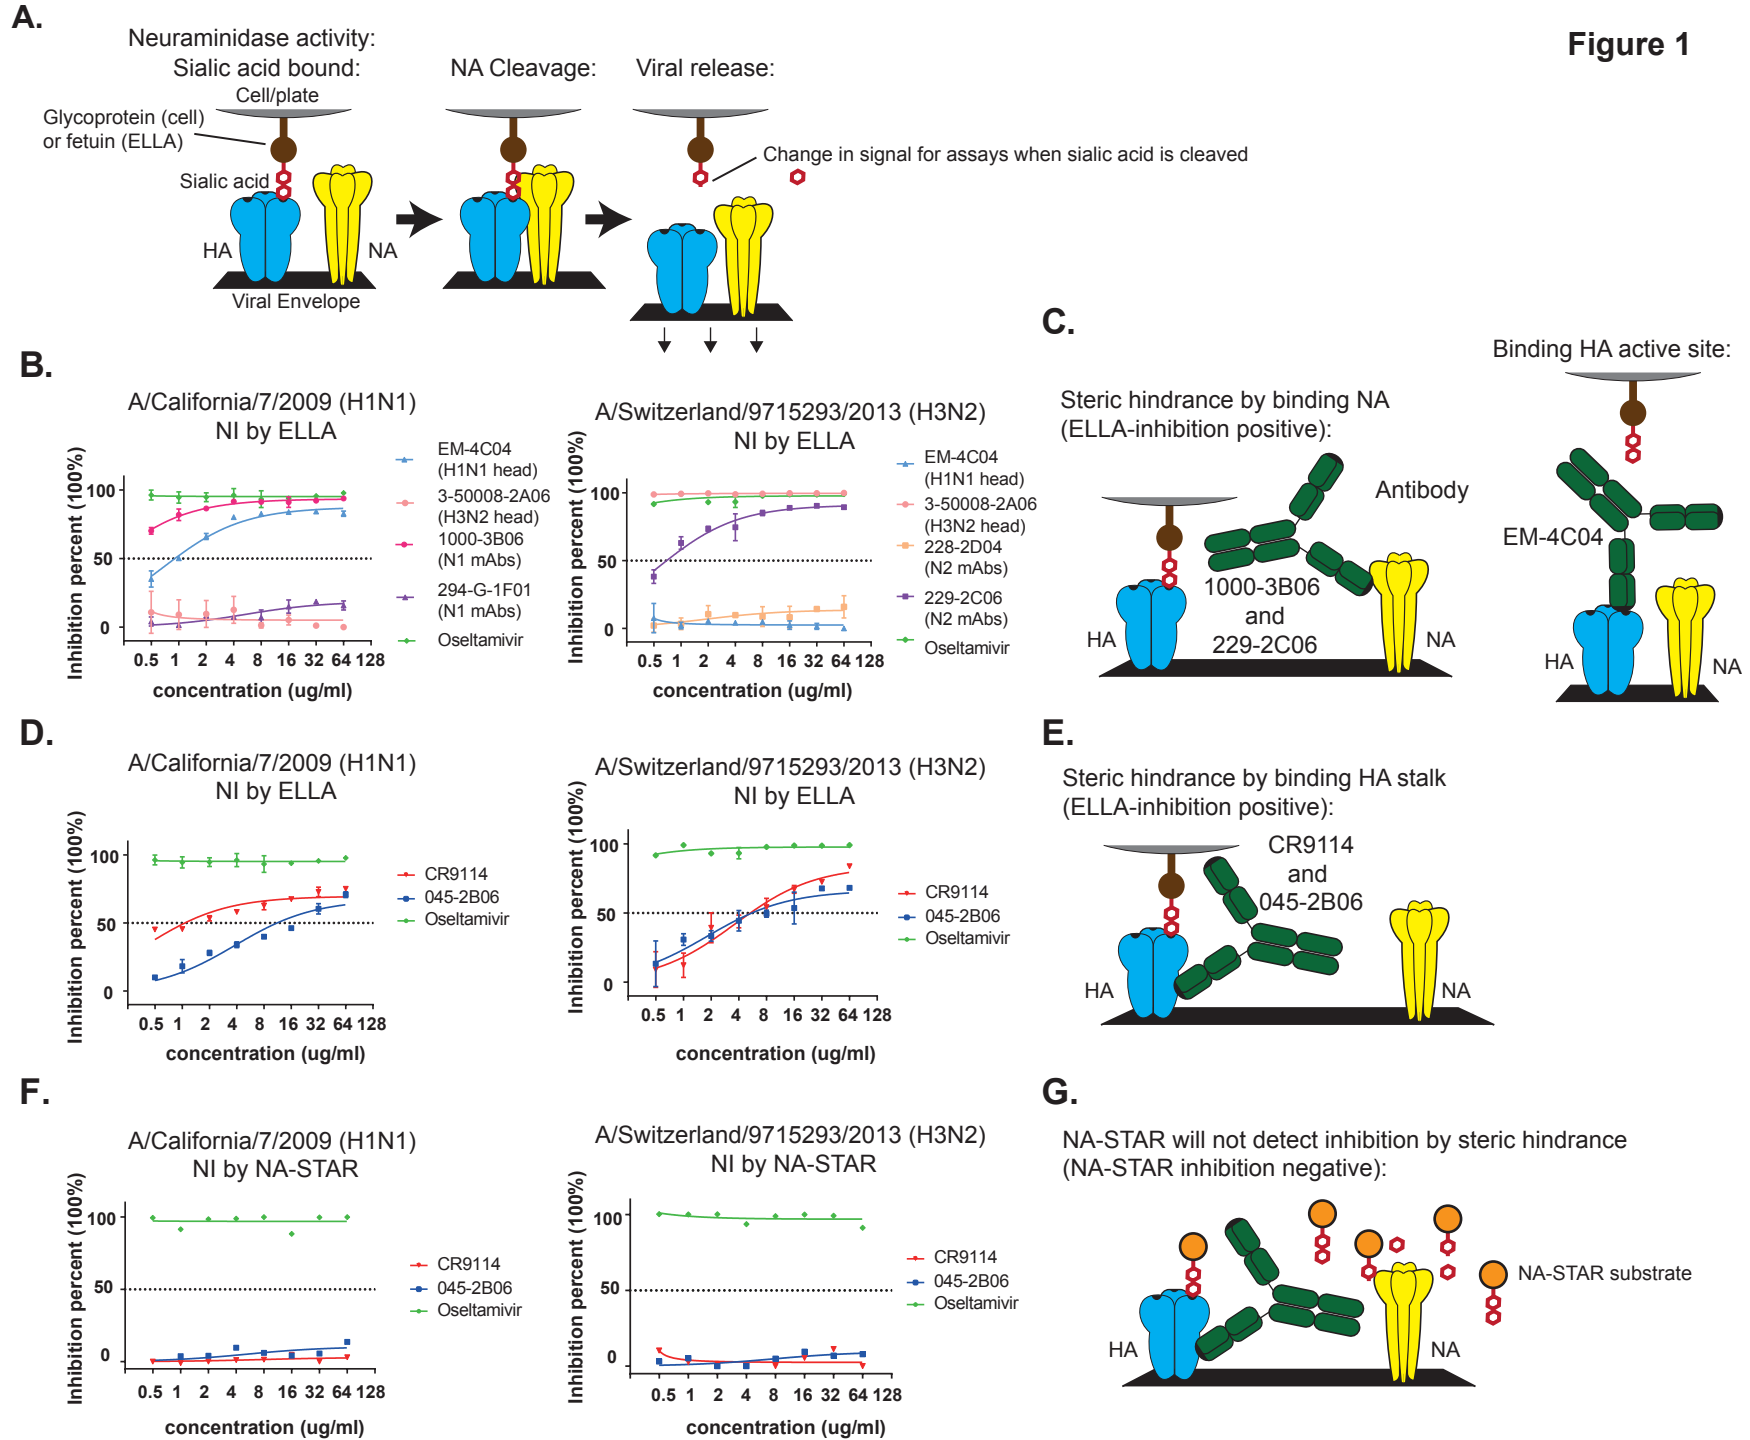

## Figure 2

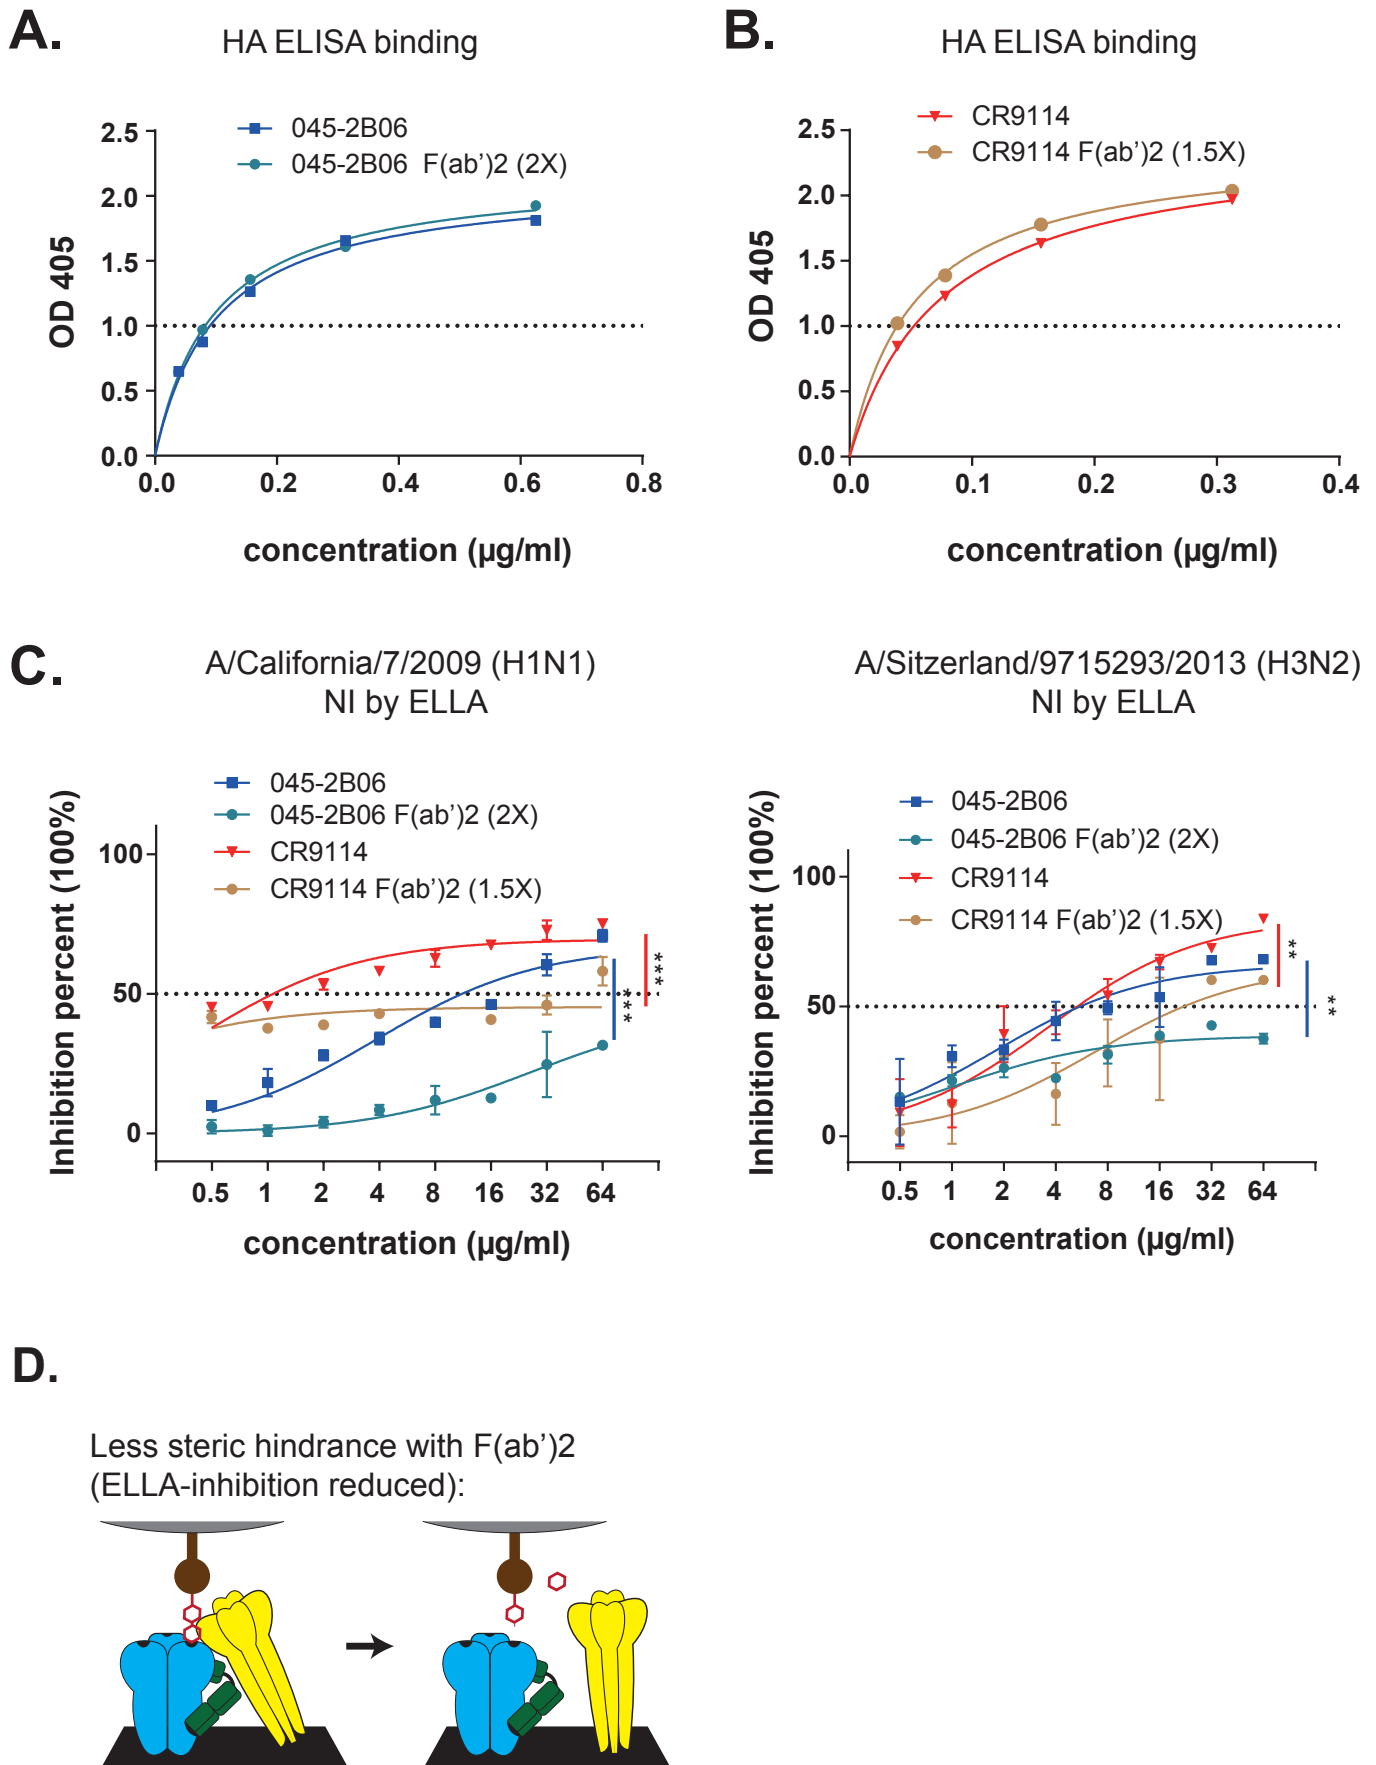

## Figure 3

**A.**

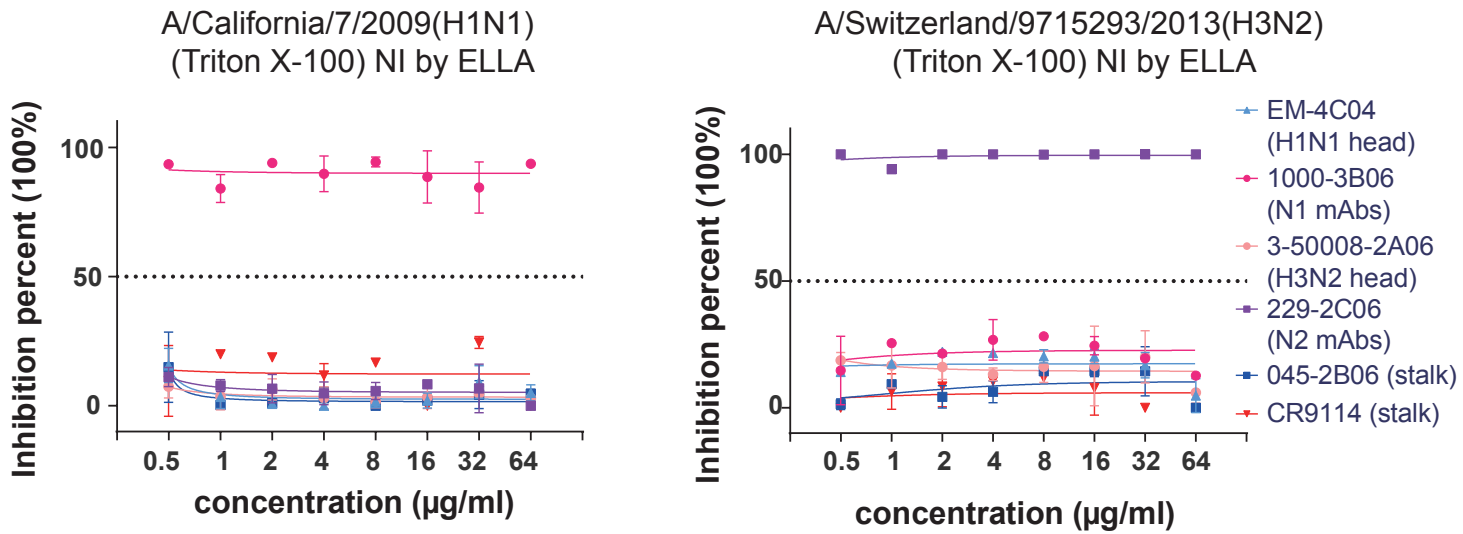

**B.**

With HA and NA released from cell membrane by Triton X-100:

No NA inhibition with anti-HA mAb:

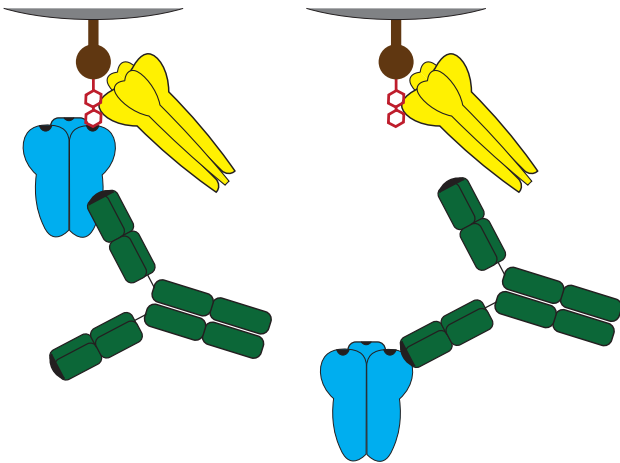

NA inhibited with anti-NA mAb:

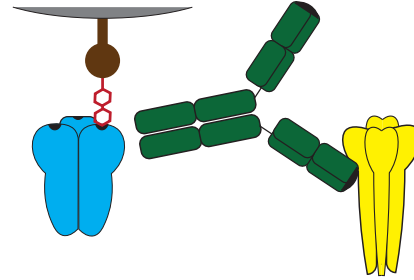

**Figure 4**

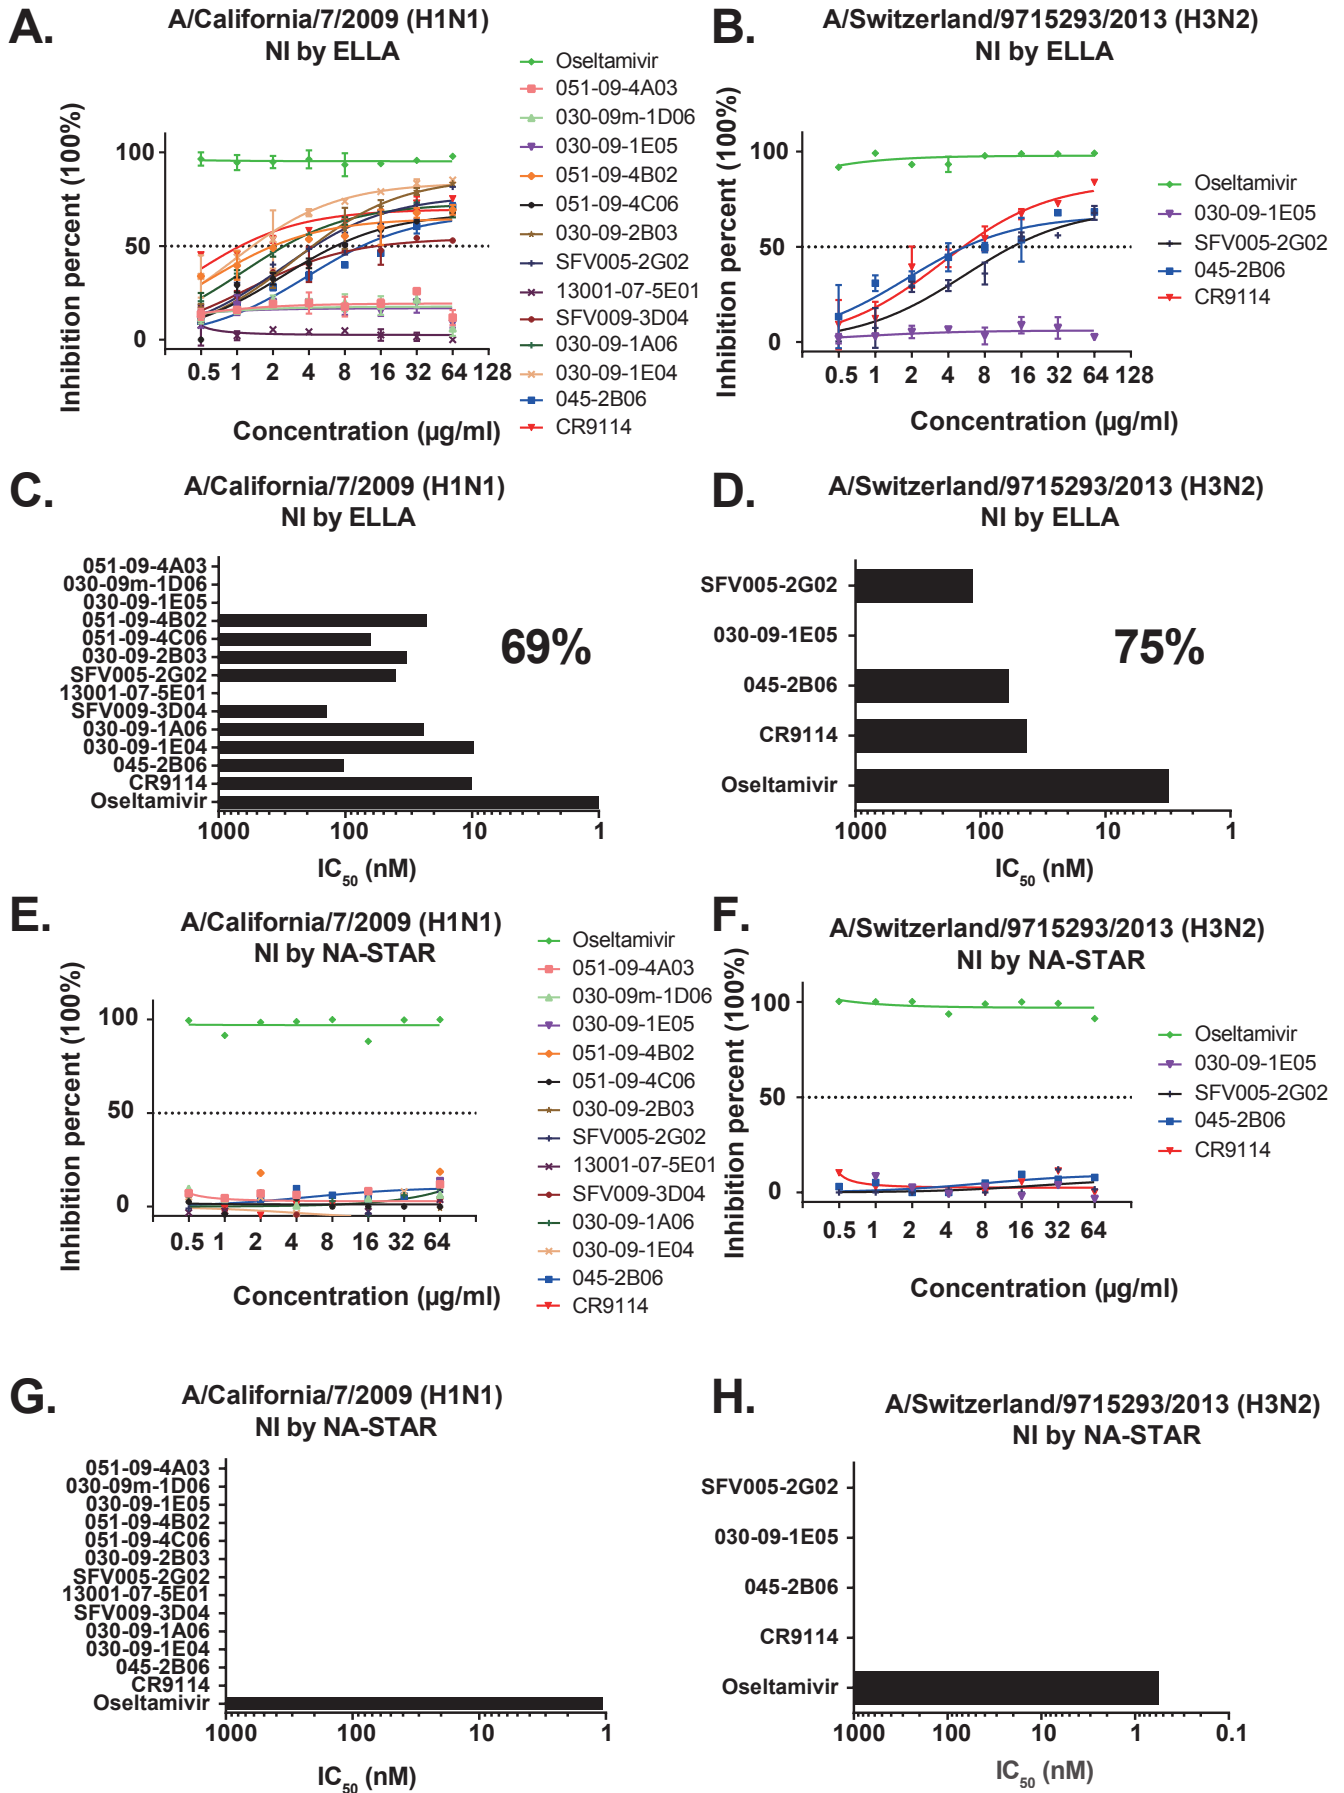

Figure 5

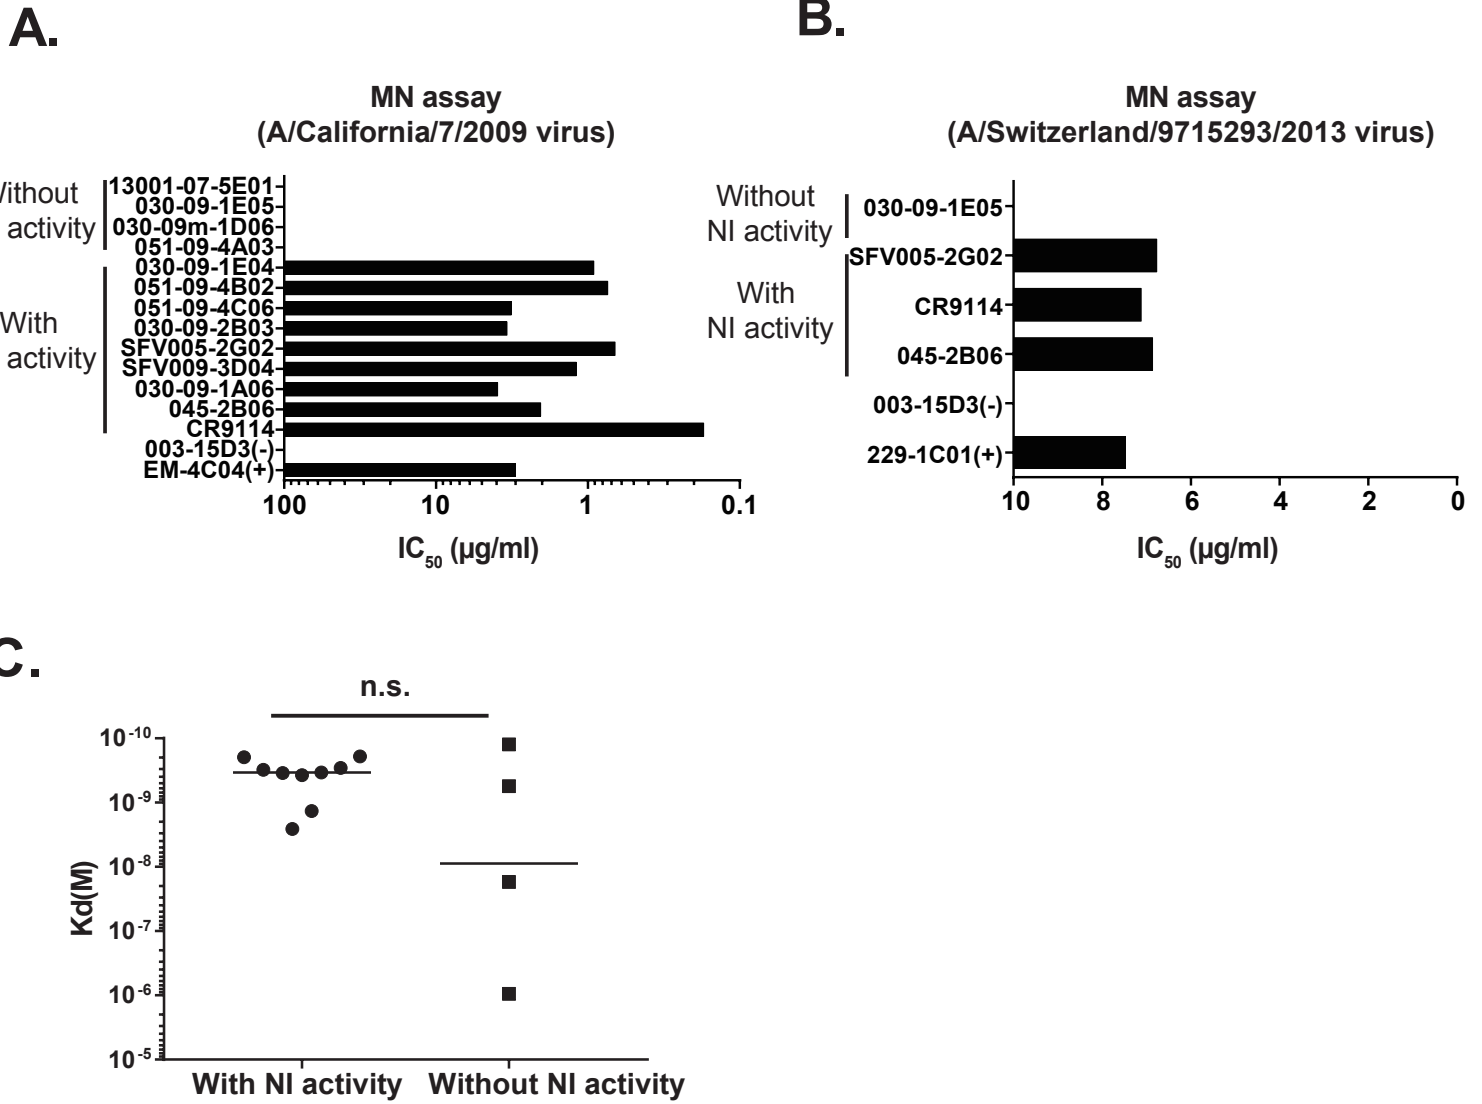

Figure 6

**A.** HA stalk mAbs with NI activity  
VH usage

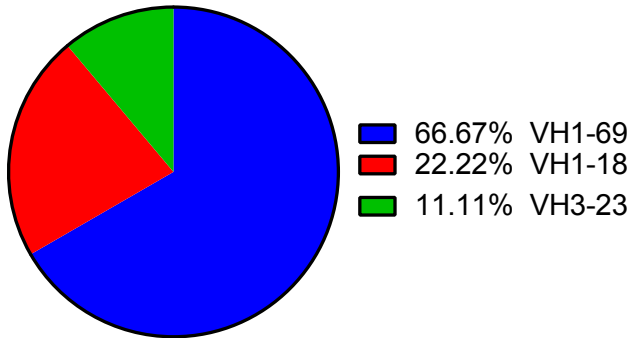

**B.** HA stalk mAbs without NI activity  
VH usage

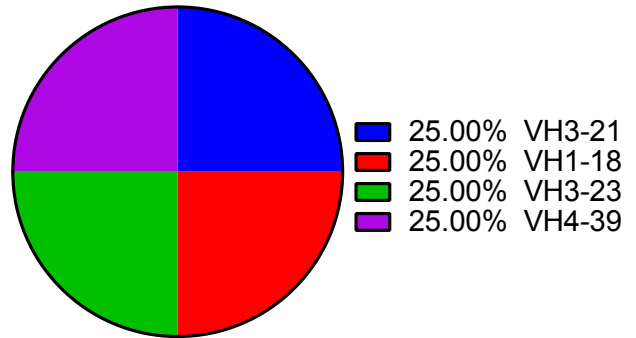

**C.** HA stalk mAbs with NI activity  
JH usage

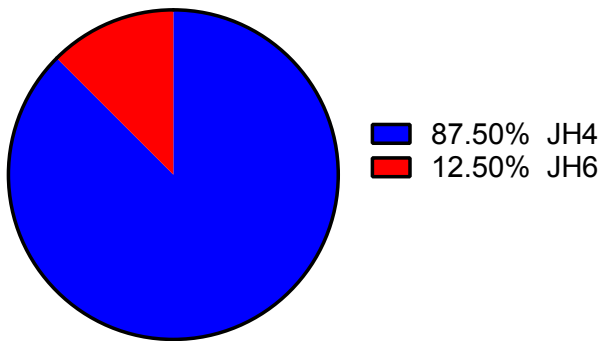

**D.** HA stalk mAbs without NI activity  
JH usage

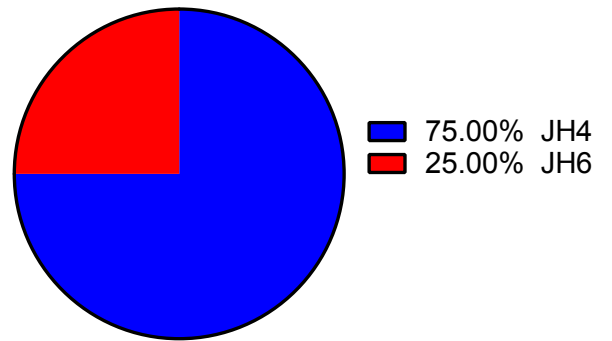

**E.**

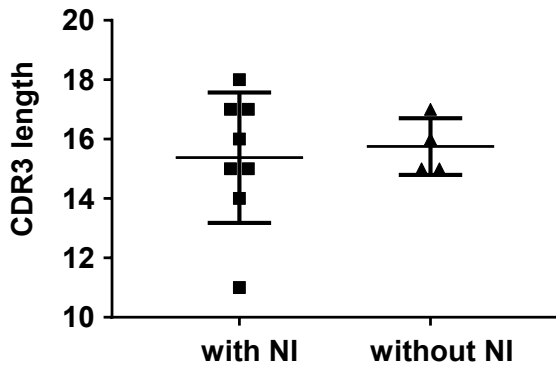

**F.**

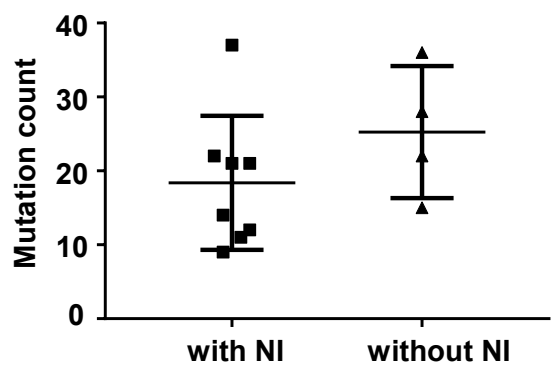

Source: https://www.biorxiv.org/content/10.1101/400036v1.full.pdf
